# Supplementary material
Source: PubMed Central journal article supplement (PMC3448012)
Supplement: NIHMS395152-supplement-6.pdf [file NIHMS395152-supplement-6.pdf]

Rudra et al. Supplementary table 5

| <b>Primers used to make plasmid constructs</b> |                                                                                                                 |
|------------------------------------------------|-----------------------------------------------------------------------------------------------------------------|
| <b>Primer name</b>                             | <b>Sequence</b>                                                                                                 |
| Primer 1                                       | GCAGATCTATGGCCAGCAGCCTGAGGCAGATCCTGGACAGCCA<br>GAAGATGGAGTGGAGGAGCAACGCCGGCGGCAGCGTTAACAT<br>GCCCAACCCTAGGCCAGC |
| Primer 2                                       | GGCAGATCTATGGGCCTGAATGACATCTTTGAGGCCCAGAAGAT<br>CGAGTGGCATGAGAACCTGTACTTCCAGGGAGCCATGCCCAACC<br>CTAGGCCAGC      |
| Primer 3                                       | GCCGAATTCTCAGTTAACCTCAAGGGCAGGGATTGGAGCACTTG                                                                    |
| Primer 4                                       | GAGCTGGAAAAGAAGCTGGGAGCTATG                                                                                     |
| Primer 5                                       | CATAGCTCCCAGCTTCTTTTCCAGCTC                                                                                     |
| Primer 6                                       | GCACGCCATGGTGAAGGACAACACCGTGCCCTG                                                                               |
| Primer 7                                       | GGCGGATCCCTTCTCTGCGCTTCTCAGGGAG                                                                                 |
| Primer 8                                       | GGCGGATCCCATGCTCGAGGGCTCTGGAGAGG                                                                                |
| Primer 9                                       | ACGCGTCGACTCACAGAGAAATGAAGTCCAGGGC                                                                              |
| <b>Primers used for ChIP-qPCR</b>              |                                                                                                                 |
| <b>Primer name</b>                             | <b>Sequence</b>                                                                                                 |
| Gmpr-forward                                   | CAGCTGGAACAGCCTTGGA                                                                                             |
| Gmpr-reverse                                   | AAATGTCAAGGCCCTGTGA                                                                                             |
| Pde3b-forward                                  | TTTGGGCCGCATAGAGAAAA                                                                                            |
| Pde3b-reverse                                  | CAGTGAATCATCAGCAGCACAA                                                                                          |
| Helios-forward                                 | TCAGTTTACTGTTCTTGGGTGAGAA                                                                                       |
| Helios-reverse                                 | AAAGTACAGAAATGGTTAATGTGAACAGA                                                                                   |
| Prdm1-forward                                  | TGTTTTACTCTGACGCGCAAA                                                                                           |
| Prdm1-reverse                                  | GATCGGCACACCCTCTGCTA                                                                                            |
| Runx1-forward                                  | CTGCGGTTTTCTCGCTCTTG                                                                                            |
| Runx1-reverse                                  | GGGATGCTGACAGCCTCAGA                                                                                            |
| Ikzf1-forward                                  | CTGGCTTCAAGTACGGATGTGA                                                                                          |
| Ikzf1-reverse                                  | TCGCTTCAGAAGAGATGCATTC                                                                                          |
| Stat3-forward                                  | ACCTCCCTGAGTTGGCTGTTC                                                                                           |
| Stat3-reverse                                  | CCCGGGCTTTTTGTAAAGCT                                                                                            |
| Bcl11b-forward                                 | CAGAGCCTGTTGCCAAGAC                                                                                             |
| Bcl11b-reverse                                 | GGCCAGACGTACATCTTCAGTTC                                                                                         |
| Nfatc2-forward                                 | GGGAAGTTCAGTTTCACATTTG                                                                                          |
| Nfatc2-reverse                                 | GCTGTAGCTCGATGGCTCCTA                                                                                           |
| Foxp1-forward                                  | CCCCGTGAAGCTGATGGT                                                                                              |
| Foxp1-reverse                                  | ATGGCAGATAGGGCAGGTA AAC                                                                                         |
| Chd4-forward                                   | TGCCACTCCTGTCTGTCTA                                                                                             |
| Chd4-reverse                                   | TCACCCACTGAGGAGAAGGAAA                                                                                          |
| Rcor1-forward                                  | GGGCTAACTCCTCGCTGTTG                                                                                            |
| Rcor1-reverse                                  | ACGCGTATCGCCCACTGTAC                                                                                            |
| Arid1a-forward                                 | TGGCAAATATGGACTGAATCGT                                                                                          |
| Arid1a-reverse                                 | CCCGGCTTGGTGATAAGAAC                                                                                            |
| Ptpn22-forward                                 | TGGAAGAAGTCTGCTGTCTGA                                                                                           |
| Ptpn22-reverse                                 | AACAAGAGGCTAACCAGAACACAA                                                                                        |
| Pdk1-forward                                   | TGCACCACACCCACAAAG                                                                                              |
| Pdk1-reverse                                   | TGGTTAAAGACACGCCCATGT                                                                                           |
| Stx11-forward                                  | GTCCCCGATGTCGAAAGAGTT                                                                                           |
| Stx11-reverse                                  | GTCCGGACGCTGGATCAG                                                                                              |

|                                            |                              |
|--------------------------------------------|------------------------------|
| Sytl2-forward                              | CCTGTTACCTGCCCTCCTT          |
| Sytl2-reverse                              | TGGTCCACACTGCATTGGTT         |
| Klf3-forward                               | TCAGGGAGGGCTGGCTAAAT         |
| Klf3-reverse                               | AACCCCAGCCTTGAAACAAA         |
| Satb1-forward                              | GTGGGTGCGACTCATCAAGA         |
| Satb1-reverse                              | TCCCCTTATGTTCTCCCAAAGA       |
| Ets2-forward                               | AAGGGCTCAGCCTCTCTCCT         |
| Ets2-reverse                               | GGTGTGTGCATGTGTGTTTACACT     |
| Prodh-forward                              | AGCACAGCAGCAGAGACCATT        |
| Prodh-reverse                              | CAGTGGCACGCCTGTTCTT          |
| Gata3 Pro1-forward                         | GGAAAACGGTCCCCTCTATAATATC    |
| Gata3 Pro1-reverse                         | CCTGTCCCAGAGACCCAAAA         |
| Gata3 Pro2-forward                         | GTCACAATACCAACCTGAGTAGCAA    |
| Gata3 Pro2-reverse                         | GAGACATAGAGAGCTACGCAATCTGA   |
| Gata3 Intron1-1-forward                    | CGCCAAGGGTTAAGGTTCTTT        |
| Gata3 Intron1-1-reverse                    | CAGTTAAGTGAAAATGAGGTAGATCAGA |
| Gata3 Intron1-2-forward                    | GAGGCGGGCGGCATA              |
| Gata3 Intron1-2-reverse                    | TCACTGCGGTATCTCTTTTTTTTT     |
| Gata3 Intron2-1-forward                    | TGACTCTACCAACGAGGCTACCT      |
| Gata3 Intron2-1-reverse                    | CGGTTAGGCCGACAGAAAAA         |
| Gata3 Intron2-2-forward                    | GGCTACATGCTCACTCCCTGTAC      |
| Gata3 Intron2-2-reverse                    | GGTCAGGGTGCCTAGGTATCTCT      |
| <b>Primers used for cDNA real-time PCR</b> |                              |
| <b>Primer name</b>                         | <b>Sequence</b>              |
| Prdm1 RT-forward                           | AAACTCCATGACCTCGCTATGAC      |
| Prdm1 RT-reverse                           | CACCTCACCTCTGCACTGA          |
| Ptpn22 RT-forward                          | CCGTAAACCAAGAGACAGCTGTAG     |
| Ptpn22 RT-reverse                          | AGACTCGGGTGTCCGTTTCAG        |
| Helios RT-forward                          | GCCCCAAGGGCTCTCT             |
| Helios RT-reverse                          | GACTCGGCAGTGCTCACACTT        |
| Pdk1 RT-forward                            | TACGGGACAGATGCGTTATC         |
| Pdk1 RT-reverse                            | ATGCTTCCAGGCGGCTTTAT         |
| Stx11 RT-forward                           | CATTGTCCCATCTGGGAAT          |
| Stx11 RT-reverse                           | CCTAGAAGCCTGGCAAAATGA        |
| Pde3b RT-forward                           | TTGGTTCTGGACAGATTGCTTACA     |
| Pde3b RT-reverse                           | ATGCAGGGATGTTGAAGATAGG       |
| Sytl2 RT-forward                           | GATCGGCTTTGGAACAGGAA         |
| Sytl2 RT-reverse                           | ACCATCTTCTCCAGAGAGCAA        |
| Klf3 RT-forward                            | GCCCCTGGCGAGAAACTT           |
| Klf3 RT-reverse                            | AGCCAAATGACCCAGCAGTTA        |
| Satb1 RT-forward                           | CTGGATTCCACTTCCCAACCT        |
| Satb1 RT-reverse                           | TGATAGAGATGGCGTTGCTGTCT      |
| Ets2 RT-forward                            | AGGACTTCCCCAGCAGCAA          |
| Ets2 RT-reverse                            | AGCTGTCCCCACCGTTCTCT         |
| Prodh RT-forward                           | TCAATGTGGATAAGCCGTTTCAT      |
| Prodh RT-reverse                           | GAGCCAGTTCCATATCCAAGGT       |
| Gapdh RT-forward                           | GTGGAGATTGTGCCATCAACG        |
| Gapdh RT-reverse                           | CAGTGGATGCAGGGATGATGTTCTG    |

|                       |                         |
|-----------------------|-------------------------|
| Ikzf1 RT-forward      | GGAAGAACTAACCACAACGAGA  |
| Ikzf1 RT-reverse      | AGCTCTTACGTTTGGCGACAT   |
| Stat3 RT-forward      | CACCTTGGATTGAGAGTCAAGAC |
| Stat3 RT-reverse      | AGGAATCGGCTATATTGCTGGT  |
| Bcl11b RT-forward     | ATCTGAGAACGTGTACTCGCA   |
| Bcl11b RT-reverse     | ATGTGGCGAAAGGCGACTG     |
| Foxp1 RT-forward      | GGTCTGAGACAAAAAGTAACGGA |
| Foxp1 RT-reverse      | TGCCCCGCACTCTAGTAAGT    |
| Runx1 RT-forward      | ACCAGCCTCTCTGCAGAACTTT  |
| Runx1 RT-reverse      | ATGGACGGCAGAGTAGGGAAC   |
| Cnot3 RT-forward      | AGCCAACGCGAACCAGAAA     |
| Cnot3 RT-reverse      | CTGCCTTTTGCCTTGATCTCA   |
| Gata3 RT-forward      | GTCATCCCTGAGCCACATCT    |
| Gata3 RT-reverse      | AGGGCTCTGCCTCTCTAACC    |
| $\beta$ 2m RT-forward | CCTGGTCTTTCTGGTGCTTG    |
| $\beta$ 2m RT-reverse | TTCAGTATGTTGGCTTCCC     |
